# Supplementary material for: Novel applications of motif-directed profiling to identify disease resistance genes in plants
Source: PubMed Central journal article supplement (PMC3853995; doi:10.1186/1746-4811-9-37), 2013-10-07
Supplement: 1746-4811-9-37-S2.pdf [file 1746-4811-9-37-S2.pdf]

| Clustername or position in RH | tags in RH                                           | Cluster in DM | sequences in DM                 |
|-------------------------------|------------------------------------------------------|---------------|---------------------------------|
| RH1.3a                        |                                                      |               | absent                          |
| chr2-3                        | too little sequence<br>information for map alignment |               |                                 |
| RH4 BIN70-79                  | few tags, none confirmed                             | C19           |                                 |
| 4f*                           | few tags, none confirmed                             |               | absent                          |
| RH5 BIN4-12                   | many tags, none confirmed                            | C20-21        |                                 |
| RH5.3                         |                                                      |               | singletons, no cluster assigned |
| RH7 BIN1-7                    | few tags, none confirmed                             | C34-35        |                                 |
| 7b*                           | few tags, none confirmed                             |               | absent                          |
| RH8 BIN36-51                  | few tags, none confirmed                             | C39           |                                 |
| RH8 BIN73-81                  | few tags, none confirmed                             | C40-41        |                                 |
| 9bc*                          |                                                      |               | absent                          |
| 9e*                           |                                                      |               | absent                          |
| RH9.1a                        |                                                      |               | singletons, no cluster assigned |
| RH9.1b                        | only CNL                                             | C42           | CNL + TNL                       |
| RH10.1                        |                                                      |               | absent                          |
| 10bc*                         | CNL and TNL                                          | C44           | only CNL                        |
|                               | no tags found                                        | C48           |                                 |
|                               | no tags found                                        | C50           |                                 |
|                               | no tags found                                        | C51           |                                 |
| RH12.1                        |                                                      |               | singletons, no cluster assigned |
| RH12.2                        | TNL                                                  |               | singletons, no TNL              |

\* cluster names according to Bakker et al. 2011
