# Supplementary material for: Novel applications of motif-directed profiling to identify disease resistance genes in plants
Source: PubMed Central journal article supplement (PMC3853995; doi:10.1186/1746-4811-9-37), 2013-10-07
Supplement: 1746-4811-9-37-S3.pdf [file 1746-4811-9-37-S3.pdf]

| Sample  | number of trimmed reads* | unique sequences within sample** | unique sequences among duplicates*** |
|---------|--------------------------|----------------------------------|--------------------------------------|
| RH89-a  | 6280                     | 2371                             |                                      |
| RH89-b  | 3804                     | 1620                             | 572                                  |
| sh83-a  | 3330                     | 1443                             |                                      |
| sh83-b  | 5147                     | 2035                             | 511                                  |
| average | 4640                     | 1867                             |                                      |

\* UID and NBS are trimmed at 5' side, successive 100nt are retained, 3' remaining sequence is discarded

\*\* Sequences occurring at least once among trimmed reads

\*\*\* Sequences occurring at least once in both samples
