# Supplementary material for: Novel applications of motif-directed profiling to identify disease resistance genes in plants
Source: Plant Methods. 2013 Oct 7;9:37. doi: 10.1186/1746-4811-9-37 (PMC3853995; doi:10.1186/1746-4811-9-37)
Supplement: Additional file 1: Table S1 — Mapping of the profiling markers produced by the indicated profiling primers in defined RH bin ranges and comparison of bin ranges to published RGA clusters. Red highlights: Bin range containing at least one marker that was confirmed, by sequence analysis, to locate in a TNL gene. Yellow highlights: Bin range containing at least one marker that was confirmed, by sequence analysis, to locate in a CNL gene. Grey highlights: Bin range containing at least one marker that was confirmed, by sequence analysis, to locate in a NLR gene. It could not be deduced if the genes belonged to the CNL or TNL class. Orange highlights: Bin range containing both markers in CNL or TNL genes as determined by sequence analysis. Blue highlights: Bin range containing at least one marker that was confirmed, by sequence analysis, to locate in a PK gene. * RGA cluster names were extended according to the nomenclature of Brugmans et al. [27]. Newly identified clusters are marked using italic font. ** RGA cluster names according to the nomenclature of Bakker et al. Red, yellow and orange shade colours indicate TIR, non TIR, or mixed cluster, respectively, as described by Bakker et al. [33]. *** RGA cluster names according to Jupe et al. [34] Red, yellow and orange shade colours indicate TIR, non-TIR, or mixed cluster respectively as described by Jupe et al. [34]. **** R gene families were assigned using a consensus from the current and previous studies [27,33,34]. [file 1746-4811-9-37-S1.pdf]

|                        | Chromosome 1 |        |        |       |        |       | Chromosome 2 |       |       |       |       | Chromosome 3 |    |       |       |       |          | Chromosome 4 |        |          |          |       |       | Chromosome 5 |        |        |         |        |       | Chromosome 6 |          |        |        |             |        |       |   |
|------------------------|--------------|--------|--------|-------|--------|-------|--------------|-------|-------|-------|-------|--------------|----|-------|-------|-------|----------|--------------|--------|----------|----------|-------|-------|--------------|--------|--------|---------|--------|-------|--------------|----------|--------|--------|-------------|--------|-------|---|
| BIN                    | 1-4          | 7-16   | 17-27  | 29-35 | 81-85  | 95-98 | 1-5          | 23-31 | 32-38 | 51-57 | 79-80 | 1-4          | 13 | 20-30 | 37-42 | 52-53 | 79-80    | 1-14         | 17-22  | 28-30    | 33-39    | 57-58 | 70-74 | 99-104       | 4-12   | 17     | 20-26   | 33-39  | 41-48 | 55           | 62-69    | 1-6    | 14-24  | 25-29       | 43-50  | 62-68 |   |
| NBS1                   | 0            | 9      | 0      | 2     | 0      | 2     | 2            | 0     | 0     | 0     | 1     | 2            | 0  | 0     | 0     | 0     | 3        | 2            | 2      | 5        | 5        | 0     | 0     | 0            | 1      | 0      | 1       | 0      | 2     | 0            | 2        | 1      | 2      | 0           | 0      | 0     |   |
| NBS2                   | 0            | 7      | 0      | 1     | 0      | 1     | 0            | 0     | 0     | 1     | 1     | 0            | 0  | 0     | 0     | 1     | 2        | 2            | 16     | 1        | 5        | 0     | 0     | 0            | 10     | 0      | 4       | 0      | 8     | 0            | 0        | 10     | 1      | 0           | 9      | 1     |   |
| NBS5a6                 | 0            | 3      | 1      | 1     | 0      | 0     | 2            | 0     | 0     | 0     | 0     | 2            | 0  | 0     | 0     | 0     | 0        | 6            | 0      | 8        | 5        | 0     | 1     | 0            | 0      | 1      | 6       | 1      | 6     | 0            | 3        | 13     | 3      | 2           | 3      | 1     |   |
| NBS9                   | 0            | 10     | 4      | 0     | 0      | 0     | 3            | 0     | 0     | 0     | 0     | 0            | 0  | 2     | 0     | 1     | 0        | 0            | 2      | 1        | 1        | 0     | 0     | 1            | 1      | 0      | 0       | 0      | 4     | 0            | 0        | 0      | 8      | 1           | 1      | 0     |   |
| NBS13R                 | 0            | 7      | 1      | 0     | 1      | 0     | 0            | 0     | 0     | 0     | 0     | 0            | 0  | 0     | 0     | 0     | 0        | 1            | 0      | 0        | 0        | 0     | 0     | 0            | 0      | 0      | 0       | 0      | 0     | 0            | 0        | 0      | 3      | 0           | 1      | 0     |   |
| NBS15F                 | 0            | 3      | 1      | 0     | 2      | 0     | 0            | 0     | 0     | 0     | 0     | 0            | 0  | 0     | 0     | 0     | 0        | 0            | 0      | 0        | 0        | 0     | 0     | 0            | 0      | 0      | 0       | 0      | 1     | 2            | 0        | 0      | 9      | 0           | 3      | 0     |   |
| TIR300F                | 0            | 9      | 0      | 0     | 0      | 0     | 0            | 0     | 0     | 1     | 0     | 0            | 0  | 0     | 0     | 0     | 1        | 0            | 0      | 0        | 3        | 0     | 1     | 1            | 0      | 1      | 0       | 0      | 0     | 4            | 0        | 0      | 0      | 2           | 0      | 0     | 0 |
| TIR300Fc               | 0            | 8      | 0      | 0     | 0      | 0     | 0            | 2     | 0     | 0     | 0     | 0            | 0  | 0     | 0     | 0     | 0        | 0            | 1      | 0        | 0        | 1     | 0     | 0            | 0      | 0      | 0       | 0      | 0     | 2            | 0        | 0      | 0      | 0           | 0      | 0     | 0 |
| TIR3R                  | 0            | 8      | 0      | 0     | 0      | 0     | 0            | 0     | 0     | 0     | 0     | 0            | 0  | 0     | 0     | 0     | 0        | 0            | 0      | 0        | 5        | 2     | 0     | 0            | 1      | 0      | 0       | 0      | 3     | 0            | 0        | 0      | 5      | 0           | 0      | 0     | 0 |
| TIR9256                | 0            | 10     | 2      | 0     | 0      | 0     | 2            | 0     | 1     | 0     | 0     | 0            | 0  | 0     | 0     | 1     | 0        | 0            | 0      | 0        | 0        | 0     | 0     | 0            | 0      | 0      | 0       | 0      | 0     | 1            | 0        | 0      | 0      | 0           | 0      | 2     | 0 |
| TIRWCF                 | 2            | 14     | 3      | 0     | 2      | 0     | 1            | 0     | 0     | 0     | 0     | 0            | 0  | 0     | 0     | 0     | 0        | 0            | 0      | 0        | 0        | 0     | 1     | 0            | 1      | 0      | 0       | 0      | 3     | 1            | 0        | 0      | 0      | 0           | 0      | 0     | 0 |
| chcF2                  | 0            | 0      | 0      | 0     | 0      | 0     | 0            | 0     | 0     | 0     | 0     | 0            | 0  | 0     | 0     | 0     | 0        | 0            | 0      | 0        | 0        | 0     | 0     | 0            | 0      | 0      | 0       | 0      | 0     | 0            | 0        | 0      | 0      | 0           | 0      | 0     | 0 |
| chcR1                  | 0            | 0      | 0      | 0     | 0      | 0     | 0            | 2     | 0     | 0     | 0     | 0            | 0  | 0     | 0     | 0     | 0        | 0            | 1      | 0        | 0        | 0     | 0     | 0            | 0      | 0      | 0       | 0      | 0     | 0            | 0        | 0      | 0      | 0           | 0      | 0     | 0 |
| chcR2                  | 0            | 0      | 0      | 0     | 0      | 0     | 0            | 0     | 0     | 0     | 0     | 0            | 0  | 0     | 0     | 0     | 0        | 0            | 0      | 0        | 1        | 0     | 0     | 0            | 0      | 0      | 0       | 0      | 0     | 0            | 0        | 0      | 0      | 0           | 0      | 0     | 0 |
| PK1Fa                  | 0            | 0      | 2      | 0     | 0      | 0     | 2            | 0     | 1     | 0     | 0     | 0            | 7  | 0     | 0     | 0     | 0        | 0            | 0      | 0        | 1        | 1     | 0     | 0            | 0      | 0      | 0       | 0      | 3     | 1            | 0        | 0      | 0      | 0           | 0      | 0     | 0 |
| PK1Fb                  | 0            | 1      | 1      | 0     | 0      | 0     | 0            | 2     | 0     | 1     | 4     | 0            | 0  | 0     | 1     | 0     | 0        | 1            | 0      | 0        | 1        | 0     | 0     | 0            | 0      | 0      | 1       | 0      | 1     | 0            | 0        | 0      | 0      | 0           | 0      | 0     | 0 |
| PK3Fb                  | 1            | 2      | 2      | 0     | 0      | 0     | 0            | 1     | 0     | 0     | 0     | 0            | 0  | 0     | 0     | 0     | 0        | 0            | 0      | 0        | 8        | 0     | 0     | 0            | 0      | 0      | 0       | 0      | 1     | 0            | 0        | 0      | 5      | 0           | 1      | 0     | 0 |
| PK4R1a                 | 0            | 4      | 1      | 0     | 0      | 0     | 0            | 0     | 0     | 0     | 2     | 0            | 0  | 0     | 1     | 0     | 0        | 0            | 0      | 0        | 1        | 0     | 0     | 1            | 0      | 0      | 0       | 0      | 0     | 0            | 0        | 0      | 0      | 0           | 0      | 0     | 0 |
| Brugmans & this study* |              | RH1.1  | RH1.2  |       | RH1.3a | RH1.3 | RH2.1        |       |       |       |       |              |    |       |       |       | RH3.1    | RH4.1a       | RH4.1  | RH4.2a   | RH4.2    |       |       |              |        |        |         |        |       |              |          |        |        |             |        |       |   |
| Bakker**               |              | 1abc   |        |       | 1d     |       |              |       |       |       |       |              |    |       |       |       |          | 4ab          |        |          | 4cd      |       |       |              | 4f     |        |         | 5a     | 5b    | 5cdef        |          | 5g     | 6a     | 6b          |        | 6cd   |   |
| Jupe***                |              | C4-5   | C3     |       |        | C1-2  |              |       |       |       |       |              |    |       |       |       |          | C9-10        | C11-12 | C13-15   | C16-18   |       | C19   |              |        | C20-21 | C22     | C23-25 | C26   |              |          | C27-28 | C29-31 |             | C32-33 |       |   |
| R gene families****    |              | N, Bs4 | N, Bs4 |       | N, Bs4 |       | Put. RGA     |       |       |       |       |              |    |       |       |       | R3a, R3b | Hero, Nrc1   | R2     | put. RGA | R3a, R3b |       |       |              | N, Bs4 | R1     | Prf1, N | N, Bs4 |       | R3a, R3b     | Rpi-blb2 | N, Bs4 |        | N, R3a, R3b |        |       |   |

|                        | Chromosome 7 |       |       |       |        | Chromosome 8 |        |       |        | Chromosome 9 |       |       |          |        |          | Chromosome 10 |        |              |        |          |          | Chromosome 11 |       |       |         | Chromosome 12 |          |          |      |          |        |          |        |  |
|------------------------|--------------|-------|-------|-------|--------|--------------|--------|-------|--------|--------------|-------|-------|----------|--------|----------|---------------|--------|--------------|--------|----------|----------|---------------|-------|-------|---------|---------------|----------|----------|------|----------|--------|----------|--------|--|
| BIN                    | 1-7          | 21-23 | 25-31 | 53-57 | 67-72  | 5-10         | 13-23  | 36-51 | 73-81  | 1-3          | 28-34 | 47-48 | 59-68    | 71-76  | 80-81    | 84            | 1-3    | 15-18        | 22-26  | 38-39    | 41-48    | 54            | 60-66 | 85-99 | 1-7     | 56-67         | 75-83    | 84-86    | 1-7  | 11-16    | 24-28  | 40-45    | 46-51  |  |
| NBS1                   | 1            | 1     | 0     | 0     | 4      | 0            | 1      | 1     | 1      | 0            | 7     | 0     | 0        | 2      | 1        | 0             | 0      | 0            | 0      | 0        | 1        | 1             | 3     | 0     | 0       | 2             | 9        | 19       | 0    | 1        | 0      | 0        | 8      |  |
| NBS2                   | 0            | 0     | 0     | 0     | 7      | 1            | 2      | 0     | 2      | 0            | 1     | 0     | 0        | 0      | 17       | 0             | 0      | 0            | 0      | 0        | 0        | 0             | 2     | 0     | 0       | 3             | 13       | 13       | 0    | 0        | 0      | 0        | 11     |  |
| NBS5a6                 | 1            | 0     | 1     | 0     | 3      | 2            | 2      | 1     | 0      | 0            | 2     | 2     | 3        | 0      | 1        | 2             | 1      | 0            | 0      | 0        | 1        | 0             | 1     | 0     | 0       | 6             | 1        | 15       | 0    | 0        | 1      | 0        | 3      |  |
| NBS9                   | 1            | 0     | 1     | 0     | 0      | 2            | 0      | 0     | 0      | 3            | 1     | 0     | 1        | 3      | 5        | 0             | 0      | 0            | 0      | 0        | 0        | 0             | 5     | 1     | 1       | 6             | 0        | 0        | 1    | 0        | 1      | 0        | 12     |  |
| NBS13R                 | 0            | 0     | 0     | 0     | 0      | 0            | 0      | 0     | 1      | 0            | 0     | 0     | 0        | 0      | 0        | 0             | 0      | 0            | 0      | 0        | 0        | 0             | 0     | 0     | 14      | 1             | 0        | 0        | 0    | 0        | 0      | 0        | 0      |  |
| NBS15F                 | 0            | 0     | 0     | 0     | 0      | 0            | 3      | 0     | 0      | 0            | 0     | 0     | 0        | 0      | 0        | 0             | 0      | 0            | 0      | 1        | 0        | 0             | 0     | 0     | 17      | 3             | 0        | 0        | 0    | 0        | 0      | 0        | 0      |  |
| TIR300F                | 0            | 0     | 0     | 1     | 3      | 0            | 4      | 0     | 0      | 0            | 0     | 0     | 0        | 0      | 0        | 1             | 0      | 0            | 0      | 0        | 0        | 0             | 0     | 0     | 25      | 1             | 0        | 0        | 0    | 0        | 0      | 1        | 1      |  |
| TIR300Fc               | 0            | 0     | 0     | 0     | 0      | 0            | 1      | 0     | 0      | 0            | 0     | 0     | 0        | 0      | 0        | 0             | 0      | 0            | 0      | 0        | 0        | 0             | 0     | 0     | 19      | 1             | 0        | 0        | 0    | 0        | 0      | 1        | 0      |  |
| TIR3R                  | 0            | 0     | 0     | 0     | 1      | 0            | 0      | 0     | 1      | 0            | 0     | 0     | 0        | 0      | 0        | 0             | 0      | 0            | 0      | 0        | 0        | 0             | 4     | 1     | 18      | 0             | 0        | 0        | 0    | 0        | 0      | 0        | 3      |  |
| TIR9256                | 0            | 0     | 0     | 0     | 1      | 0            | 5      | 2     | 0      | 0            | 0     | 0     | 0        | 0      | 0        | 0             | 0      | 0            | 0      | 0        | 0        | 0             | 1     | 0     | 13      | 0             | 0        | 0        | 0    | 0        | 0      | 0        | 3      |  |
| TIRWCF                 | 2            | 0     | 0     | 1     | 2      | 0            | 1      | 0     | 0      | 0            | 0     | 0     | 0        | 1      | 0        | 0             | 0      | 0            | 0      | 0        | 0        | 0             | 0     | 0     | 19      | 0             | 0        | 0        | 0    | 0        | 0      | 4        | 3      |  |
| chcF2                  | 0            | 0     | 0     | 0     | 1      | 0            | 0      | 0     | 0      | 0            | 0     | 0     | 0        | 0      | 0        | 0             | 0      | 0            | 0      | 1        | 1        | 3             | 0     | 0     | 0       | 0             | 0        | 0        | 0    | 0        | 0      | 0        | 3      |  |
| chcR1                  | 0            | 0     | 0     | 0     | 0      | 0            | 0      | 0     | 0      | 0            | 0     | 0     | 0        | 0      | 0        | 0             | 0      | 0            | 0      | 6        | 4        | 1             | 0     | 0     | 0       | 0             | 0        | 0        | 0    | 0        | 0      | 0        | 0      |  |
| chcR2                  | 0            | 0     | 0     | 0     | 0      | 0            | 0      | 0     | 0      | 0            | 0     | 0     | 0        | 0      | 0        | 0             | 0      | 0            | 1      | 8        | 6        | 1             | 0     | 0     | 0       | 0             | 0        | 0        | 0    | 0        | 0      | 0        | 4      |  |
| PK1Fa                  | 0            | 0     | 0     | 0     | 0      | 0            | 0      | 1     | 0      | 0            | 0     | 0     | 0        | 0      | 0        | 0             | 0      | 0            | 1      | 0        | 0        | 0             | 1     | 0     | 0       | 0             | 0        | 0        | 0    | 0        | 0      | 0        | 1      |  |
| PK1Fb                  | 0            | 0     | 0     | 0     | 1      | 0            | 1      | 2     | 0      | 0            | 1     | 0     | 0        | 0      | 0        | 0             | 0      | 0            | 0      | 0        | 0        | 0             | 0     | 0     | 0       | 0             | 0        | 0        | 0    | 2        | 0      | 0        | 13     |  |
| PK3Fb                  | 0            | 0     | 0     | 1     | 1      | 0            | 3      | 0     | 0      | 0            | 0     | 0     | 2        | 0      | 0        | 0             | 0      | 3            | 0      | 0        | 0        | 0             | 1     | 0     | 0       | 0             | 0        | 0        | 0    | 0        | 0      | 6        | 7      |  |
| PK4R1a                 | 0            | 1     | 0     | 0     | 0      | 1            | 0      | 1     | 0      | 0            | 0     | 0     | 0        | 0      | 0        | 0             | 0      | 0            | 0      | 0        | 0        | 0             | 0     | 0     | 3       | 0             | 0        | 0        | 0    | 0        | 3      | 3        | 0      |  |
| Brugmans & this study* |              |       |       |       | RH7.1  | RH8.1a       | RH8.1  |       |        |              |       |       | RH9.1a   | RH9.1b | RH9.1    |               | RH10.1 |              | RH10.2 | RH10.3   | RH10.4   |               |       |       | RH11.1a | RH11.1        | RH11.2   | RH11.3   |      | RH12.1   | RH12.2 | RH12.3   |        |  |
| Bakker**               |              |       |       | 7b    | 7cd    | 8ab          | 8c     |       |        |              | 9bc   | 9e    |          |        | 9f       |               | 10a    |              |        |          |          |               | 10bc  |       |         | 11a           | 11bc     | 11d      | 11ef | 12a      |        |          | 12b    |  |
| Jupe***                | C34-35       |       |       |       | C36    | C37          | C38    | C39   | C40-41 |              |       |       |          | C42    | C43      |               |        |              | C48    | C47      | C46      | C45           | C44   |       |         | C49           | C52      | C53-54   | C55  | C61-63   |        |          | C56-60 |  |
| R gene families****    |              |       |       |       | N, Bs4 | Rpi-blb1     | N, Bs4 |       |        |              |       |       | Rpi-vnt1 |        | Rpi-mcq1 | Sw5           |        | Putative RGA |        | Rpi-chc1 | Rpi-chc1 | Rpi-chc1      |       |       | N, Bs4  | R3a, R3b      | R3a, R3b | R3a, R3b |      | Rx, Gpa2 | N, Bs4 | Rx, Gpa2 |        |  |
